# Supplementary material for: Shorebirds wintering in Southeast Asia demonstrate trans-Himalayan flights
Source: PubMed Central journal article supplement (PMC7732824; doi:10.1038/s41598-020-77897-z), 2020-12-11

## Shorebirds wintering in Southeast Asia demonstrate trans-Himalayan flights

David Li<sup>1</sup>, Geoffrey Davison<sup>1</sup>, Simeon Lisovski<sup>2</sup>, Phil F. Battley<sup>3</sup>, Zhijun Ma<sup>4</sup>, Shufen Yang<sup>1</sup>, Choon Beng How<sup>1</sup>, Doug Watkins<sup>5</sup>, Philip Round<sup>6</sup>, Alex Yee<sup>1</sup>, Vupasana Srinivasan<sup>1</sup>, Clarice Teo<sup>1</sup>, Robert Teo<sup>1</sup>, Adrian Loo<sup>1</sup>, Chee Chiew Leong<sup>1</sup>, Kenneth Er<sup>1</sup>

1 – National Parks Board, Singapore, 718925, Singapore

2 – Alfred-Wegener-Institute Helmholtz Centre for Marine and Polar Research, Potsdam, Germany

3 – Wildlife & Ecology Group, Massey University, Palmerston North, 4442, New Zealand

4 – Ministry of Education Key Laboratory for Biodiversity Science and Ecological Engineering, Coastal Ecosystems Research Station of the Yangtze River Estuary, Institute of Biodiversity Science, School of Life Sciences, Fudan University, Shanghai, 200433, China

5 – Australasian Wader Studies Group, Carlton VIC, 3053, Australia

6 – Department of Biology, Mahidol University, Bangkok, 10400, Thailand

Correspondence and requests for materials should be addressed to D. L. (email: David\_Li@nparks.gov.sg)

### Supplementary Information:

**Supplementary Table S1. Bird ringing recoveries and flag resightings of Common Redshanks in Southeast and East Asia between 1965 and 2019.**

| No. | Flagging & ringing site <sup>1</sup>       | Date flagged or ringed | Observation or recapture site                       | Date seen or recaptured | Source <sup>2</sup> | Method <sup>3</sup> |
|-----|--------------------------------------------|------------------------|-----------------------------------------------------|-------------------------|---------------------|---------------------|
| 1   | Chongming Dongtan Reserve, Shanghai, China |                        | Xiaoyangkou, Rudong, Jiangsu, China                 | 31/5/2011               | 5                   | 2                   |
| 2   | Chongming Dongtan Reserve, Shanghai, China |                        | Yancheng Nature Reserve, China                      | 17/6/2009               | 5                   | 2                   |
| 3   | Chongming Dongtan Reserve, Shanghai, China |                        | Chiang-Chun, Tainan County, Taiwan area             | 4/9/2005                | 1, 5, 8             | 2                   |
| 4   | Chongming Dongtan Reserve, Shanghai, China |                        | Chi-Ku, Tainan County, Taiwan area                  | 25/8/2007               | 1, 5, 8             | 2                   |
| 5   | Chongming Dongtan Reserve, Shanghai, China |                        | Hsia-Pu, Ilan County, Taiwan area                   | 10/4/2010               | 1, 5, 8             | 2                   |
| 6   | Chongming Dongtan Reserve, Shanghai, China |                        | Chi-Ku, Tainan County, Taiwan area                  | 16/10/2012              | 5, 8                | 2                   |
| 7   | Chongming Dongtan Reserve, Shanghai, China |                        | Mei-Shan, Hsin-chu City, Taiwan area                | 13/1/2013               | 5, 8                | 2                   |
| 8   | Chongming Dongtan Reserve, Shanghai, China |                        | Hsin-pao, Changhwa County, Taiwan area              | 21/11/2014              | 5, 8                | 2                   |
| 9   | Chongming Dongtan Reserve, Shanghai, China |                        | Hsiang-Shan, Hsinchu City, Taiwan area              | 6/5/2015                | 5, 8                | 2                   |
| 10  | Chongming Dongtan Reserve, Shanghai, China |                        | Lake Ci Fishponds, Kinmen, Taiwan area              | 8/4/2018                | 1, 5                | 2                   |
| 11  | Chongming Dongtan Reserve, Shanghai, China |                        | Kamisuda, Inashiki-shi, Ibaraki-ken, Japan          | 17/8/2008               | 3, 5                | 2                   |
| 12  | Chongming Dongtan Reserve, Shanghai, China |                        | Olango Island, the Philippines                      | 23/2/2007               | 1, 5                | 2                   |
| 13  | Chongming Dongtan Reserve, Shanghai, China |                        | Olango Island, the Philippines                      | 8/12/2008               | 1, 5                | 2                   |
| 14  | Chongming Dongtan Reserve, Shanghai, China |                        | Olango Island, the Philippines                      | 14/1/2011               | 1, 5                | 2                   |
| 15  | Chongming Dongtan Reserve, Shanghai, China |                        | Olango Island, the Philippines                      | 5/2/2011                | 1, 5                | 2                   |
| 16  | Chongming Dongtan Reserve, Shanghai, China |                        | Tawau, Sabah, Malaysia                              | 10/2/2019               | 18                  | 2                   |
| 17  | Hangzhou bay, Zhejiang, China              |                        | Tawau, Sabah, Malaysia                              | 23/2/2019               | 18                  | 2                   |
| 18  | Mai Po Nature Reserve, Hong Kong, China    | 5/5/1979               | Taishan County, Guangdong, China                    | 27/4/1980               | 11                  | 1                   |
| 19  | Mai Po Nature Reserve, Hong Kong, China    | 10/8/1988              | Chenghai, Guangdong, China                          | 10/4/1992               | 11                  | 1                   |
| 20  | Mai Po Nature Reserve, Hong Kong, China    | 9/8/1989               | Xuan Thuy, River River Delta, Vietnam               | 14/10/1992              | 11                  | 1                   |
| 21  | Mai Po Nature Reserve, Hong Kong, China    | 9/9/1991               | Laizhou Bay, Shandong, China                        | May/June 1992           | 11                  | 1                   |
| 22  | Mai Po Nature Reserve, Hong Kong, China    | 20/8/1988              | Yang Jiao Gou Salt Farm, Chouguang, Shandong, China | 21/5/1993               | 11                  | 1                   |
| 23  | Mai Po Nature Reserve, Hong Kong, China    | 2/11/2011              | Nanpu, Bohai Bay, Hebei, China                      | 4/5/2016                | 1, 7                | 2                   |
| 24  | Mai Po Nature Reserve, Hong Kong, China    |                        | Kapar Power Station Ash Ponds, Malaysia             | 13/11/2016              | 1, 7                | 2                   |
| 25  | Mai Po Nature Reserve, Hong Kong, China    |                        | Dashbalbar, Dornod, Mongolia                        | 20/5/2019               | 7                   | 2                   |
| 26  | Mai Po Nature Reserve, Hong Kong, China    | 27/4/2013              | Fish Pond Wonorejo, Surabaya, Indonesia             | 24/8/2013               | 1, 7                | 2                   |
| 27  | Taipei-Kaohsiung, Taiwan area              |                        | Yalu Jiang National Nature Reserve, China           | 18/3/2010               | 1                   | 2                   |
| 28  | Taipei-Kaohsiung, Taiwan area              |                        | Nanpu, Bohai Bay, Hebei, China                      | 30/4/2018               | 1                   | 2                   |
| 29  | Han-pao, Changhwa County, Taiwan area      |                        | Uratabaru, Nagura, Ishigaki-shi, Okinawa-ken, Japan | 28/9/2006               | 1                   | 2                   |
| 30  | Han-pao, Changhwa County, Taiwan area      | 4/10/2005              | Uratabaru, Nagura, Ishigaki-shi, Okinawa-ken, Japan | 29/10/2006              | 3, 8                | 2                   |
| 31  | Han-pao, Changhwa County, Taiwan area      | 27/8/2007              | JujiangSaltfarm, Shijing, Nanan, Fujian, China      | 24/8/2008               | 4, 6                | 1                   |
| 32  | Han-pao, Changhwa County, Taiwan area      |                        | Tung-Kang, Yalu River Estuary, Liaoning, China      | 18/3/2010               | 8                   | 2                   |
| 33  | Changhwa County, Taiwan area               |                        | Xing zhuang river mouth, Lian Yun Gang, China       | 18/5/2014               | 8                   | 2                   |
| 34  | Szu-Tsao, Tainan City, Taiwan area         | 31/3/1990              | Hangzhou Bay, Zhejiang, China                       | 12/5/1990               | 4, 6                | 1                   |
| 35  | Szu-Tsao, Tainan City, Taiwan area         | 21/4/1990              | Hangzhou Bay, Zhejiang, China                       | 30/12/1990              | 4, 6                | 1                   |
| 36  | Szu-Tsao, Tainan City, Taiwan area         |                        | Nagura-anbaru, Ishigaki-shi, Okinawa-ken, Japan     | 28/9/2006               | 3                   | 2                   |
| 37  | Szu-Tsao, Tainan City, Taiwan area         | 31/10/1999             | Szu-Tsao, Tainan City, Taiwan area                  | 7/2/2012                | 8                   | 2                   |
| 38  | Szu-Tsao, Tainan City, Taiwan area         | 13/9/2012              | Sankaku-ike, Tomigusuku-shi, Okinawa-ken, Japan     | 17/8/2017               | 3, 8                | 1                   |
| 39  | Jambi, Sumatra, Indonesia                  |                        | Khok Kham, Samut Sakhon, Thailand                   | 12/8/2008               | 1                   | 2                   |

| No. | Flagging & ringing site <sup>1</sup>           | Date flagged or ringed | Observation or recapture site                         | Date seen or recaptured | Source <sup>2</sup> | Method <sup>3</sup> |
|-----|------------------------------------------------|------------------------|-------------------------------------------------------|-------------------------|---------------------|---------------------|
| 40  | Jambi, Sumatra, Indonesia                      |                        | Pools between Lujuhe & Haibin Yuchang, Tianjin, China | 28/7/2009               | 1                   | 2                   |
| 41  | Jambi, Sumatra, Indonesia                      |                        | Kalong, Samut Sakhorn province, Thailand              | 3/8/2010                | 1                   | 2                   |
| 42  | Jambi, Sumatra, Indonesia                      |                        | Khok Kham, Samut Sakhon province, Thailand            | 21/8/2012               | 9                   | 2                   |
| 43  | Jambi, Sumatra, Indonesia                      |                        | Hongyuan grassland, Sichuan, China                    | 15/5/2015               | 12                  | 2                   |
| 44  | Jambi, Sumatra, Indonesia                      |                        | Salt Pond, Subei County, Gansu, China                 | 9/6/2016                | 1                   | 2                   |
| 45  | Jambi, Sumatra, Indonesia                      |                        | Pasir Debu prawn-ponds, near Penaga, Pinang, Malaysia | 11/8/2010               | 1                   | 2                   |
| 46  | Shunkunitai, Nemuro-shi, Hokkaido, Japan       |                        | Lin-Pien, Pingtung County, Taiwan area                | 23/4/2000               | 3, 8                | 2                   |
| 47  | Shunkunitai, Nemuro-shi, Hokkaido, Japan       |                        | Onaga Tidal Flat, Naha, Okinawa, Japan                | 22/4/2009               | 3, 1                | 2                   |
| 48  | Lake Komuke, Monbetsu-shi, Hokkaido, Japan     | 12/9/2011              | Sohara-cho, Matsusaka-shi, Mie-ken, Japan             | 8/10/2011               | 3                   | 2                   |
| 49  | Torinoumi, Watari-cho, Miyagi-ken, Japan       | 2/9/2013               | Ushigome, Kisarazu-shi, Chiba-ken, Japan              | 22/12/2013              | 3                   | 2                   |
| 50  | Torinoumi, Watari-cho, Miyagi-ken, Japan       | 2/9/2013               | Ushigome, Kisarazu-shi, Chiba-ken, Japan              | 28/10/2014              | 3                   | 2                   |
| 51  | Hiyagon tidal-flat, Okinawa, Okinawa, Japan    | 24/1/2008              | Tai-Ping estuary, Taitung County, Taiwan area         | 22/9/2011               | 3                   | 1                   |
| 52  | Hiyagon tidal-flat, Okinawa, Okinawa, Japan    | 25/2/2014              | Yatabe, Kamisu-shi, Ibaraki-ken, Japan                | 8/4/2014                | 3                   | 2                   |
| 53  | Hiyagon tidal-flat, Okinawa, Okinawa, Japan    | 26/2/2014              | Hengsha Island, Shanghai, China                       | 7/9/2014                | 3                   | 2                   |
| 54  | Hiyagon tidal-flat, Okinawa, Okinawa, Japan    | 6/5/2013               | Yalujiang National Nature Reserve, China              | 26/6/2016               | 1, 3, 8             | 2                   |
| 55  | Hiyagon tidal-flat, Okinawa, Okinawa, Japan    | 4/3/2012               | Dapeng Bay, Pingtung County, Taiwan                   | 13/9/2014               | 8                   | 2                   |
| 56  | Hiyagon tidal-flat, Okinawa, Okinawa, Japan    | 4/3/2012               | Dapeng Bay, Pingtung County, Taiwan                   | 22/10/2016              | 3, 8                | 2                   |
| 57  | Hiyagon tidal-flat, Okinawa, Japan             | 4/3/2012               | Dapeng Bay, Pingtung County, Taiwan                   | 30/8/2018               | 3, 8                | 2                   |
| 58  | Kuala Selangor, Malaysia*                      | 27/11/1987             | Xining, Qinghai, China                                | Oct 1990                | 4, 6, 10            | 1                   |
| 59  | Tanjung Kerang, Selangor, Malaysia             | 21/4/1989              | Laem Phak Bia, Thailand                               | 10/9/2006               | 9, 23               | 1                   |
| 60  | Kuala Gula, Perak, Malaysia                    | 22/10/2017             | Near Hongyuan airport, Sichuan, China                 | Jul 2018                | 10, 15              | 1                   |
| 61  | Oriental Phil Alangilanon Manjuyud, Philippine | 15/10/1965             | Limahong Channel, Pangasinan, Luzon, Philippine       | 12/9/1966               | 20                  | 1                   |
| 62  | Oriental Phil Alangilanon Manjuyud, Philippine | 5/11/1967              | Vyazemsky district, prominent, Khabarovsk, Russia     | 28/4/1968               | 2, 20               | 1                   |
| 63  | Iwahig, Palawan, Philippine                    | 26/8/1967              | Lingayen, Pangasinan, Luzon, Philippine               | 8/8/1969                | 20                  | 1                   |
| 64  | Odoptu Bay, Sakhalin, Russia                   |                        | Oki beach, Amihoshi-ku, Hyogo-ken                     | 21/9/2011               | 2, 3                | 2                   |
| 65  | Serangoon, Singapore                           | 13/9/1983              | Pattani Bay, Thailand                                 | 22/7/1985               | 22, 23              | 1                   |
| 66  | Sungei Buloh Wetland Reserve, Singapore        |                        | Xiao Bei Hu Wetlands, Qinghai Lake, China             | 7/6/2012                | 17                  | 2                   |
| 67  | Sungei Buloh Wetland Reserve, Singapore        |                        | Xiao Bei Hu Wetlands, Qinghai Lake, China             | 14/8/2018               | 24                  | 2                   |
| 68  | Sungei Buloh Wetland Reserve, Singapore        | 7/12/2012              | Lhalu Wetland, Lasha, Xizang, China                   | 10/6/2013               | 13, 16              | 2                   |
| 69  | Sungei Buloh Wetland Reserve, Singapore        |                        | Mianyang, Sichuan, China                              | 12/4/2015               | 15                  | 2                   |
| 70  | Sungei Buloh Wetland Reserve, Singapore        | 18/11/2013             | Khok Kham, Samut Sakhon, Thailand                     | 31/7/2018               | 14                  | 2                   |
| 71  | Sungei Buloh Wetland Reserve, Singapore        |                        | Khok Kham, Samut Sakhon, Thailand                     | 17/8/2008               | 1                   | 2                   |
| 72  | Sungei Buloh Wetland Reserve, Singapore        | 22/10/2013             | Outside Khao Sam Roi Yot National Park, Thailand      | 1/9/2018                | 19                  | 2                   |
| 73  | Sungei Buloh Wetland Reserve, Singapore        | 16/10/2017             | Bang Pu, Samut Prakan, Thailand                       | 2/8/2018                | 9                   | 2                   |
| 74  | Sungei Buloh Wetland Reserve, Singapore        | 16/10/2017             | Bang Pu, Samut Prakan, Thailand                       | 26/9/2018               | 9                   | 2                   |
| 75  | Sungei Buloh Wetland Reserve, Singapore        | 16/10/2017             | Teluk Air Tawar, Butterworth, Malaysia                | 2/5/2019                | 21                  | 2                   |
| 76  | Laem Phak Bia, Phetchaburi, Thailand           | 27/8/2006              | Jambi, Sumatra, Indonesia                             | 28/4/2008               | 9                   | 1                   |
| 77  | Inner Gulf of Thailand                         |                        | Tanjung Tokong, Penang, Malaysia                      | 7/10/2006               | 1, 23               | 2                   |
| 78  | Inner Gulf of Thailand                         |                        | Tanjung Tokong, Penang, Malaysia                      | 5/3/2007                | 1                   | 2                   |
| 79  | Inner Gulf of Thailand                         |                        | Pulau Burung, Nibong Tebal, Penang, Malaysia          | 29/8/2007               | 1                   | 2                   |
| 80  | Inner Gulf of Thailand                         |                        | Parit Penyengat Laut, Muar, Johor, Malaysia           | 22/12/2007              | 1                   | 2                   |
| 81  | Inner Gulf of Thailand                         |                        | Parit Penyengat Laut, Muar, Johor, Malaysia           | 4/10/2008               | 1                   | 2                   |
| 82  | Inner Gulf of Thailand                         |                        | Kg. Sri Menanti, Johor, Malaysia                      | 10/9/2010               | 9                   | 2                   |
| 83  | Inner Gulf of Thailand                         |                        | Kapar Power Station Ash Ponds, Malaysia               | 10/9/2010               | 1                   | 2                   |
| 84  | Inner Gulf of Thailand                         |                        | Sungei Buloh Wetland Reserve, Singapore               | 12/10/2006              | 1, 23               | 2                   |
| 85  | Inner Gulf of Thailand                         |                        | Sungei Buloh Wetland Reserve, Singapore               | 27/7/2009               | 1                   | 2                   |

**Notes:**

All dates are indicated by day/month/year.

Flagging & ringing site<sup>1</sup>: \*- Zhang & Yang (1997) reported the bird ringed at Kuching, East Malaysia, it was later confirmed to have come from Kuala Selangor, West Malaysia (Ahmad Khusaini Bin Mohd Kharip Shah, Department of Wildlife and National Parks (Perhilitan) Peninsular Malaysia pers. comm.).

Source<sup>2</sup>: 1-Australasian Wader Studies Group; 2-Bird Ringing Centre of Russia, IEE RAS; 3-Yamashina Institute for Ornithology; 4-China National Bird Banding Center; 5-Shanghai Chongming Dongtan Nature Reserve; 6- Zhang F.Y. & Yang R.L. *China Bird Migration Research* (in Chinese). (Forestry Press, Beijing, 1997); 7-Hong Kong Waterbirds Ringing Group; 8-Taiwan Wader Study Group; 9-Philip Round pers. comm. (Thailand); 10-Wildlife Department Malaysia; 11- Carey, G.J., M.L. Chalmers, D.A. Diskin, P.R. Kennerley, P.J. Leader, M.R. Leve, R.W. Lewthwaite, D.S. Melville, M. Turnbull, & L. Young. 2001. *The Avifauna of Hong Kong*. (Hong Kong Bird Watching Society, 2001); 12- Standen, R. & Londo, I. Sumatran-flagged Common Redshank seen on the breeding grounds. *Tattler* 37, 7–8 (2015); 13- Lu, X. *The birds of Qinghai-Tibet Plateau of China*. (In Chinese). (Hunan Science and Technology Press, Changsha, 2018); 14-Bung Boraphet Wildlife Research Station; 15-Hao Liu pers. comm.; 16-Hongfen Cao pers. comm.; 17- Chia, A. A 'Ringing' Endorsement for Singapore Migrant's Flight of Wonder. *Nature Watch* 21, 17 (2013); 18-Stanley Shao pers. comm.; 19-Charles Currin pers. comm.; 20- McClure, H. E. *Migration and survival of the birds of Asia*. (US Army Medical Component, SEATO Medical Project, Bangkok, 1974); 21-Nur Munira pers. comm.; 22-Watkins, D. Sungei Buloh Project, Singapore. *Shorebird Banding Workshop - Oct-Nov.1990*. (Report to Asian Wetland Bureau 1990); 23-Round, P.D. & D. Gardner. *The birds of the Bangkok area*. (White Lotus, Bangkok 2008); 24- WenXiao Dong pers. comm.

Method<sup>3</sup>: 1- Ringing recovery; 2- Flag observation.

**Supplementary Table S2. Individual migratory movements of adult Common Redshanks from and to Sungei Buloh Wetland Reserve, Singapore, determined using light-level geolocation (Geo) and satellite tracking (PTT).**

| Tracker No.                 | Tag type | Northward migration              |                                                    |                              |                 |                                        | Days at breeding grounds | Southward migration          |                                                    |                                  |                 |                                        |
|-----------------------------|----------|----------------------------------|----------------------------------------------------|------------------------------|-----------------|----------------------------------------|--------------------------|------------------------------|----------------------------------------------------|----------------------------------|-----------------|----------------------------------------|
|                             |          | Date depart non-breeding grounds | No. of key stopover sites / days used <sup>1</sup> | Date arrive breeding grounds | Days travelling | Migration distance N (km) <sup>2</sup> |                          | Date depart breeding grounds | No. of key stopover sites / days used <sup>1</sup> | Date arrive non-breeding grounds | Days travelling | Migration distance S (km) <sup>2</sup> |
| P332 <sup>3</sup>           | Geo      | 9/5/2015                         | 0/0                                                | 13/5/2015                    | 4               | 4054                                   | 103                      | 24/8/2015                    | 1/3                                                | Nil                              | Nil             |                                        |
| P359/<br>36139 <sup>3</sup> | Geo      | 13/3/2015                        | 2/62                                               | 22/5/2015                    | 70              | 4341                                   | 98                       | 28/8/2015                    | 0/0                                                | 2/9/2015                         | 5               | 3964                                   |
| P359/<br>36139 <sup>3</sup> | PTT      | 8/3/2018                         | 2/69                                               | 19/5/2018                    | 72              | 3897                                   | 103                      | 30/8/2018                    | Nil                                                | Nil <sup>6</sup>                 | Nil             | Nil                                    |
| 36134 <sup>3</sup>          | PTT      | 6/5/2018                         | 2/10                                               | 21/5/2018                    | 15              | 3735                                   | 99                       | 28/8/2018                    | 1/21                                               | 23/9/2018                        | 26              | 3891                                   |
| 36134 <sup>3</sup>          | PTT      | 1/5/2019                         | 1/9                                                | 17/5/2019                    | 16              | 3829                                   | 105                      | 30/8/2019                    | 2/14                                               | 25/9/2019                        | 26              | 3972                                   |
| P385 <sup>4</sup>           | Geo      | 4/4/2015                         | 1/7                                                | 19/4/2016                    | 15              | 4999                                   | 74                       | 2/7/2016                     | 2/11                                               | 26/7/2015                        | 24              | 6571                                   |
| P809 <sup>4</sup>           | Geo      | 1/4/2015                         | 1/11                                               | 17/4/2015                    | 16              | 4525                                   | 82                       | 8/7/2015                     | 1/9                                                | 23/7/2015                        | 15              | 4010                                   |
| 36135 <sup>4</sup>          | PTT      | 16/4/2018                        | 1/25                                               | 18/5/2018                    | 32              | 4658 <sup>7</sup>                      | 95                       | 21/8/2018                    | 4/31                                               | 2/10/2018                        | 42              | 4171                                   |
| P352                        | Geo      | 8/5/2015                         | 1/3                                                | 21/5/2015                    | 13              | 4994                                   | 105                      | 3/9/2015                     | 0/0                                                | 12/9/2015                        | 9               | 4383                                   |
| P812                        | Geo      | 8/5/2015                         | 0/0                                                | 13/5/2015 <sup>5</sup>       | 5               | 4116                                   | Nil                      | Nil                          | Nil                                                | Nil                              | Nil             | Nil                                    |
| P817                        | Geo      | 13/4/2015                        | 2/29                                               | Nil <sup>6</sup>             | 38+             | Nil                                    | Nil                      | Nil                          | Nil                                                | Nil                              | Nil             | Nil                                    |
| P820                        | Geo      | 13/4/2015                        | 0/0                                                | 16/4/2015                    | 3               | 4920                                   | 104                      | 29/7/2015                    | 0/0                                                | 2/8/2015                         | 4               | 5635                                   |
| P820                        | Geo      | 8/4/2016                         | 0/0                                                | 11/4/2016                    | 3               | 4617                                   | 105                      | 25/7/2016                    | 0/0                                                | 29/7/2016                        | 4               | 5009                                   |

**Notes:**

All dates are indicated by day/month/year in SGT (UTC+8).

1 – For the list of stopover sites see Table S4; for criteria of stopover sites see methods.

2 – Migration distance calculated as summed great circle distances between consecutive locations between non-breeding and breeding grounds for both geolocator tagged birds (median points of modelled tracks) and PTT-tagged birds (high quality locations).

3 – Birds that took a direct Himalayan crossing during both northward and southward migration.

4 – Birds that took a direct Himalayan crossing during southward migration only.

5 – Tracker stopped on 2 August at breeding grounds.

6 – Tracker stopped on 21 May during northward migration.

7 – Distance to post-breeding grounds.

8 – Tracker stopped on 2 Sep during southward migration.

**Supplementary Table S3. Individual migratory movements of adult Whimbrels from and to Singapore using satellite tracking.**

| Tracker No.         | Northward migration              |                                                    |                              |                 |                                        | Days at breeding grounds | Southward migration          |                                                    |                                  |                 |                                        |
|---------------------|----------------------------------|----------------------------------------------------|------------------------------|-----------------|----------------------------------------|--------------------------|------------------------------|----------------------------------------------------|----------------------------------|-----------------|----------------------------------------|
|                     | Date depart non-breeding grounds | No. of key stopover sites / days used <sup>1</sup> | Date arrive breeding grounds | Days travelling | Migration distance N (km) <sup>2</sup> |                          | Date depart breeding grounds | No. of key stopover sites / days used <sup>1</sup> | Date arrive non-breeding grounds | Days travelling | Migration distance S (km) <sup>2</sup> |
| 36133               | 23/4/2019                        | 1/22                                               | 27/5/2019                    | 34              | 8,353                                  | 63                       | 29/7/2019                    | 2/50                                               | 24/9/2019                        | 57              | 8,317                                  |
| 168746              | 30/4/2018                        | 2/16                                               | 7/6/2018                     | 38              | 9,019                                  | 61                       | 7/8/2018                     | 2/42                                               | 30/9/2018                        | 54              | 8,398                                  |
| 168746              | 28/4/2019                        | 3/21                                               | 1/6/2019                     | 34              | 9,041                                  | 63                       | 3/8/2019                     | 3/39                                               | 24/9/2019                        | 52              | 8,530                                  |
| 168748              | 3/5/2018 <sup>4</sup>            | 3/28                                               | Nil                          | Nil             | Nil                                    | Nil                      | Nil                          | Nil                                                | Nil                              | Nil             | Nil                                    |
| 168749              | 21/4/2018                        | 2/19                                               | 24/5/2018                    | 33              | 8,557                                  | 67                       | 30/7/2018                    | 3/49                                               | 2/10/2018                        | 64              | 8,764                                  |
| 168749              | 20/4/2019                        | 2/24                                               | 24/5/2019                    | 34              | 8,266                                  | 66                       | 29/7/2019                    | 3/33                                               | 15/9/2019                        | 48              | 8,111                                  |
| 168750 <sup>3</sup> | 26/4/2018                        | 2/31                                               | 15/6/2018                    | 50              | 8,039                                  | 61                       | 15/8/2018                    | 4/100                                              | 14/12/2018                       | 121             | 8,619                                  |
| 168750 <sup>3</sup> | 25/4/2019                        | 1/14                                               | 4/6/2019                     | 40              | 8,114                                  | 83                       | 26/8/2019                    | 2/28                                               | 5/10/2019                        | 40              | 8,556                                  |

**Notes:**

All dates are indicated by day/month/year in SGT(UTC+8).

1 – For the criteria of stopover site see methods, for a full list of stopover sites see Table S6.

2 – Migration distance calculated as summed great circle distances between consecutive locations between non-breeding and breeding ground from high quality locations.

3 – Birds that took a direct Himalayan crossing during both northward and southward migration.

4 – Tracker stopped on 11/6/2018 during northward migration.

**Supplementary Table S4. List of stopover sites and breeding grounds of adult Common Redshanks from and to Sungei Buloh Wetland Reserve, Singapore, determined using light-level geolocation and satellite tracking.**

| Tracker No. | Locations                                                        | Coordinates <sup>1</sup>                                  | Date (no. of days)                      | Stopover sites or breeding grounds <sup>2</sup> |
|-------------|------------------------------------------------------------------|-----------------------------------------------------------|-----------------------------------------|-------------------------------------------------|
| P332        | Golmud, Qinghai, China                                           | 35.79°N (35.71°N-35.89°N), 93.37°E (93.30°E-93.42°E)      | 13/5–24/8/2015 (103)                    | Breeding grounds                                |
| P332        | Inner Gulf of Thailand                                           | 14.04°N (10.48°N -18.13°N), 100.97°E (100.11°E -101.80°E) | 27–30/8/2015 (3)                        | Southward migration                             |
| P352        | Border of Myanmar and China                                      | 29.31°N (28.07°N -30.75°N), 99.03°E (98.24°E -99.80°E)    | 15–18/5/2015 (3)                        | Northward migration                             |
| P352        | Ulan County, Qinghai, China                                      | 36.68°N (36.56°N -36.81°N), 98.96°E (98.88°E -99.04°E)    | 21/5–3/9/2015 (105)                     | Breeding grounds                                |
| P359        | Southern Malaysia/Central Sumatra                                | 1.32°N (-1.89°N -4.80°N), 102.45°E (102.01°E -102.93°E)   | 14/3–26/4/2015 (42)                     | Northward migration                             |
| P359        | Likely Gulf of Mottama, Myanmar                                  | 16.18°N (14.56°N -18.06°N), 97.37°E (96.65°E -98.07°E)    | 28/4–18/5/2015 (20)                     | Northward migration                             |
| P359        | Nagqu, Xizang/Golmud, Qinghai border, China                      | 33.42°N (33.01°N -33.84°N), 90.68°E (90.38°E -90.97°E)    | 20/5–29/8/2015 (98)                     | Breeding grounds                                |
| P385        | Ngawa, Sichuan, China                                            | 32.96°N (31.62°N -34.47°N), 102.87°E (102.45°E -103.32°E) | 7–14/4/2015 (7)                         | Northward migration                             |
| P385        | Haixi, Qinghai, China                                            | 37.86°N (37.72°N -38.02°N), 97.28°E (97.15°E -97.41°E)    | 19/4–2/7/2015 (74)                      | Breeding grounds                                |
| P385        | Myanmar coast                                                    | 14.97°N (13.47°N -16.98°N), 95.60°E (94.75°E -96.49°E)    | 8–11/7/2015 (3)                         | Southward migration                             |
| P385        | Inner Gulf of Thailand                                           | 12.63°N (11.81°N -13.56°N), 100.48°E (100.08°E -100.90°E) | 15–23/7/2015 (8)                        | Southward migration                             |
| P809        | Linxia, Gansu, China                                             | 35.23°N (34.32°N -36.34°N), 103.44°E (103.08°E -103.80°E) | 3–14/4/2015 (11)                        | Northward migration                             |
| P809        | Golog, Qinghai, China                                            | 35.29°N (35.14°N -35.45°N), 98.05°E (97.95°E -98.16°E)    | 17/4–8/7/2015 (82)                      | Breeding grounds                                |
| P809        | Inner Gulf of Thailand                                           | 13.07°N (12.44°N -13.85°N), 100.87°E (100.52°E -101.20°E) | 12–21/7/2015 (9)                        | Southward migration                             |
| P812        | Yushu, Qinghai, China                                            | 34.35°N (34.23°N -34.49°N), 93.36°E (93.26°E -93.48°E)    | 12/5–2/8/2015 (82, tracker stopped)     | Breeding grounds                                |
| P817        | Southern Myanmar                                                 | 15.59°N (14.61°N -16.74°N), 98.21°E (97.87°E -98.53°E)    | 15/4–7/5/2015 (22)                      | Northward migration                             |
| P817        | Garze, Sichuan, China                                            | 30.35°N (29.52°N -31.53°N), 101.37°E (100.75°E -101.93°E) | 10–17/5/2015 (7, tracker stopped)       | Northward migration                             |
| P820        | Possibly Inner Mongolia/ Gansu Boarder, China                    | 39.03°N (38.61°N -39.66°N), 101.56°E (101.27°E -101.84°E) | 16/4–25/7/2015 (9)                      | Pre-breeding grounds                            |
| P820        | Haixi, Qinghai, China                                            | 36.61°N (36.55°N -36.70°N), 97.65°E (97.60°E -97.71°E)    | 28/4–10/7/2015 (73)                     | Breeding grounds                                |
| P820        | Gansu and Qinghai Border, China                                  | 38.06°N (37.83°N -38.39°N), 101.39°E (101.13°E -101.62°E) | 13–29/7/2015 (16)                       | Post-breeding grounds                           |
| P820        | Haibei, Qinghai, China                                           | 37.29°N (36.19°N -38.17°N), 100.68°E (100.20°E -101.21°E) | 11–16/4/2016 (5)                        | Pre-breeding grounds                            |
| P820        | Gansu/Qinghai border, China                                      | 39.01°N (38.92°N -39.11°N), 99.49°E (99.40°E -99.57°E)    | 18/4–25/7/2016 (98)                     | Breeding grounds                                |
| 36134       | Hmau Bhi Kyun coast, Myanmar                                     | 16.19°N, 95.89°E                                          | 8–15/5/2018 (7)                         | Northward migration                             |
| 36134       | Zhegu Co, Shannan, Xizang, China                                 | 28.69°N, 91.66°E                                          | 18–20/5/2018 (3)                        | Northward migration                             |
| 36134       | Southeast end of Siling Cuo, Xizang, China                       | 31.54°N, 89.17°E                                          | 21/5–28/8/2018 (99)                     | Breeding grounds                                |
| 36134       | Gulf of Mottama, Myanmar                                         | 16.88°N, 96.84°E                                          | 31/8–21/9/2018 (21)                     | Southward migration                             |
| 36134       | Gulf of Mottama, Myanmar                                         | 17.16°N, 97.02°E                                          | 3–12/5/2019 (9)                         | Northward migration                             |
| 36134       | Southeast end of Siling Cuo, Xizang, China                       | 31.54°N, 89.17°E                                          | 17/5–30/8/2019 (105)                    | Breeding grounds                                |
| 36134       | Gulf of Mottama, Myanmar                                         | 16.99°N, 96.80°E                                          | 4–15/9/2019 (11)                        | Southward migration                             |
| 36134       | northern Selangor coast, Malaysia                                | 3.54°N, 101.07°E                                          | 18–20/9/2019 (3)                        | Southward migration                             |
| 36135       | Laem Sing District, Chanthaburi province, Inner Gulf of Thailand | 12.39°N, 102.16°E                                         | 19/4–14/5/2018 (25)                     | Northward migration                             |
| 36135       | Hongyuan, Aba, Sichuan Province, China                           | 32.46°N, 102.40°E                                         | 18/5–15/7/2018 (58)                     | Breeding grounds                                |
| 36135       | Gangnagema Cuo, Madoi, Golog, Qinghai Province, China            | 34.33°N, 98.62°E                                          | 17/7–21/8/2018 (35)                     | Post-breeding grounds                           |
| 36135       | Gulf of Mottama, Myanmar                                         | 16.97°N, 96.83°E                                          | 25/8–4/9/2018 (10)                      | Southward migration                             |
| 36135       | Prachuap Khiri Khan, Thailand                                    | 11.83°N, 99.80°E                                          | 7–15/9/2018 (8)                         | Southward migration                             |
| 36135       | Thale Noi National Park, Thailand                                | 7.69°N, 100.35°E                                          | 16–23/9/2018 (7)                        | Southward migration                             |
| 36135       | Batu Pahat coast, Johor, Malaysia                                | 1.80°N, 102.89°E                                          | 25/9–1/10/2018 (6)                      | Southward migration                             |
| 36139       | Kelang Islands, Selangor, Malaysia                               | 2.95°N, 101.19°E                                          | 9/3–28/4/2018 (50)                      | Northward migration                             |
| 36139       | Gulf of Mottama, Myanmar                                         | 17.16°N, 97.03°E                                          | 29/4–18/5/2018 (19)                     | Northward migration                             |
| 36139       | Zagya Zangbo River in Nagqu, Xizang, China                       | 32.19°N, 89.99°E                                          | 19/5–24/7/2018 (56 excluding 21–31 May) | Breeding grounds                                |
| 36139       | Jiang Jia Cuo, Nagqu, Xizang, China                              | 31.97°N, 89.84°E                                          | 21–31/5/2018 (10)                       | Breeding grounds                                |
| 36139       | Namuka Cuo, Nagqu, Xizang, China                                 | 31.88°N, 89.75°E                                          | 22–30/8/2018 (8)                        | Post-breeding grounds                           |

**Notes:**

All dates are indicated by day/month/year.

1 – Coordinates for geolocator tagged birds shown as median point and 95% credibility interval.

2 – For the criteria of stopover site see methods.

**Supplementary Table S5. Mean elevations of trans-Himalayan and eastern migrations of Common Redshanks and Whimbrels.**

| Species         | Migration | Trans-Himalayan (m asl) |   | Eastern (m asl) |    | Z      | P      |
|-----------------|-----------|-------------------------|---|-----------------|----|--------|--------|
|                 |           | Mean±SD                 | N | Mean±SD         | N  |        |        |
| Common Redshank | North     | 871±321                 | 4 | 968±358         | 7  | 0.4665 | 0.6847 |
|                 | South     | 1402±579                | 4 | 1386±494        | 4  | 0.0581 | 0.9673 |
|                 | Overall   | 1136±518                | 8 | 1140±452        | 12 | 0.0204 | 0.9851 |
| Whimbrel        | North     | 999±120                 | 2 | 330±45          | 3  | -      | 1.9664 |
|                 | South     | 956±124                 | 2 | 304±45          | 3  | -      | 1.9511 |
|                 | Overall   | 977±102                 | 4 | 316±56          | 6  | -      | 2.9344 |

**Note:**

For Redshanks, Eastern refers to route circumventing the Himalayan crossing. For Whimbrel, Eastern refers to coastal East Asia.

**Supplementary Table S6. List of stopover sites and breeding grounds of adult Whimbrels from and to Singapore determined using satellite tracking.**

| Tracker No. | Locations                                                     | Coordinates                            | Date (no. of)        | Stopover sites or breeding grounds |
|-------------|---------------------------------------------------------------|----------------------------------------|----------------------|------------------------------------|
| 36133       | Haixing, Cangzhou, Hebei, China                               | 38.17°N, 117.75°E                      | 30/4–22/5/2019 (22)  | Northward migration                |
| 36133       | Olenyoksky District, Sakha Republic, Russia                   | 69.84°N, 110.50°E                      | 27/5–29/7/2019 (63)  | Breeding grounds                   |
| 36133       | Yangcheng Reservoir, Cangzhou, Hebei, China                   | 38.17°N, 117.75°E                      | 31/7–16/9/2019 (47)  | Southward migration                |
| 36133       | Pahang and Johor coast, Malaysia                              | 3.98°N, 103.44°E -<br>2.65°N, 103.70°E | 20–22/9/2019 (3)     | Southward migration                |
| 168746      | Jiuduansha, Shanghai, China                                   | 31.22°N, 122.03°E                      | 14–24/5/2018 (10)    | Northward migration                |
| 168746      | Sandao Reservoir, Songyuan City, Jilin, China                 | 45.38°N, 125.56°E                      | 28/5–3/6/2018 (6)    | Northward migration                |
| 168746      | Taymursky Dolgano-Nenetsky District, Krasnoyarsk Krai, Russia | 70.26°N, 106.97°E                      | 7/6–7/8/2018 (61)    | Breeding grounds                   |
| 168746      | Yaitai, Shandong, China                                       | 37.43°N, 121.55°E                      | 11/8–5/9/2018 (25)   | Southward migration                |
| 168746      | Vinh Van Phong, Khanh Hoa, Vietnam                            | 12.61°N, 109.20°E                      | 10–27/9/2018 (17)    | Southward migration                |
| 168746      | Aiwen Bay, Zhejiang, China                                    | 28.28°N, 121.58°E                      | 1–8/5/2019 (7)       | Northward migration                |
| 168746      | Laiyang, Shandong, China                                      | 36.64°N, 120.69°E                      | 13–23/5/2019 (10)    | Northward migration                |
| 168746      | Zhaoyuan, Heilongjiang, China                                 | 45.43°N, 125.38°E                      | 25–29/5/2019 (4)     | Northward migration                |
| 168746      | Taymursky Dolgano-Nenetsky District, Krasnoyarsk Krai, Russia | 70.26°N, 106.98°E                      | 1/6–3/8/2019 (63)    | Breeding grounds                   |
| 168746      | Huludao, Liaoning, China                                      | 39.99°N, 119.88°E                      | 7–19/8/2019 (12)     | Southward migration                |
| 168746      | Laishan, Yantai, Shandong, China                              | 37.44°N, 121.55°E                      | 22/8–6/9/2019 (15)   | Southward migration                |
| 168746      | Van Hung, Van Niah, Khanh Hoa, Vietnam                        | 12.61°N, 109.20°E                      | 10–22/9/2019 (12)    | Southward migration                |
| 168748      | Yangtze River at Yichang City, Hubei, China                   | 30.41°N, 111.46°E                      | 5–8/5/2018 (3)       | Northward migration                |
| 168748      | Binhai, Tianjin coast, China                                  | 38.89°N, 117.54°E                      | 15–20/5/2018 (5)     | Northward migration                |
| 168748      | Mogochinskiy Rayon, Zabaykalsky Krai, Russia                  | 54.27°N, 121.02°E                      | 22/5–11/6/2018 (20)  | Northward migration                |
| 168749      | Quanzhou, Fujian, China                                       | 24.67°N, 118.44°E                      | 25–29/4/2018 (4)     | Northward migration                |
| 168749      | Taeryong River mouth, DPR Korea                               | 39.52°N, 125.42°E                      | 4–19/5/2018 (15)     | Northward migration                |
| 168749      | Verkhoyansky District, Sakha Republic, Russia                 | 67.65°N, 131.68°E                      | 24/5–30/7/2018 (67)  | Breeding grounds                   |
| 168749      | Baicheng, Jilin, China                                        | 46.03°N, 123.28°E                      | 2–5/8/2018 (3)       | Southward migration                |
| 168749      | Hongzi Lake, Songyuan, Jilin, China                           | 45.20°N, 124.03°E                      | 7–29/8/2018 (22)     | Southward migration                |
| 168749      | Changpi Port, Hainan Island, China                            | 19.46°N, 110.79°E                      | 5–29/9/2018 (24)     | Southward migration                |
| 168749      | Hwanghae, DPRK                                                | 37.84°N, 126.22°E                      | 26–28/4/2019 (3)     | Northward migration                |
| 168749      | Taeryong River mouth, DPRK                                    | 39.52°N, 125.42°E                      | 30/4–21/5/2019 (21)  | Northward migration                |
| 168749      | Verkhoyansky District, Sakha Republic, Russia                 | 67.65°N, 131.68°E                      | 24/5–29/7/2019 (66)  | Breeding grounds                   |
| 168749      | Hongzi Lake, Jilin, China                                     | 45.18°N, 124.07°E                      | 1–22/8/2019 (21)     | Southward migration                |
| 168749      | My Xuan, Ba Ria - Vung Tau, Southern Vietnam                  | 10.62°N, 107.02°E                      | 27–29/8/2019 (3)     | Southward migration                |
| 168749      | An Ngai, Ba Ria - Vung Tau, Southern Vietnam                  | 10.43°N, 107.21°E                      | 3–12/9/2019 (9)      | Southward migration                |
| 168750      | Gulf of Mottama, Myanmar                                      | 17.15°N, 96.81°E                       | 30/4–16/5/2018 (16)  | Northward migration                |
| 168750      | Mizhi Lake, Shuanghu, Nagqu, Xizang, China                    | 36.26°N, 88.89°E                       | 20/5–4/6/2018 (15)   | Northward migration                |
| 168750      | Tazovsky District, Yamalo-Nenets Autonomous Okrug, Russia     | 67.65°N, 79.90°E                       | 15–21/6/2018 (6)     | Breeding grounds                   |
| 168750      | Turukhansky District, Krasnoyarsk Krai, Russia                | 67.91°N, 82.50°E                       | 23/6–15/8/2018 (53)  | Breeding grounds                   |
| 168750      | Ozero Bychye, Altai Krai, Russia                              | 51.83°N, 80.22°E                       | 18–31/8/2018 (13)    | Southward migration                |
| 168750      | Bosten Lake, Xinjiang, China                                  | 42.00°N, 86.84°E                       | 2–20/9/2018 (18)     | Southward migration                |
| 168750      | Bhitarkanika National Park, Odisha, India                     | 20.68°N, 86.86°E                       | 24/9–26/10/2018 (32) | Southward migration                |
| 168750      | Krabi Estuary, Thailand                                       | 8.02°N, 98.93°E                        | 31/10–7/12/2018 (37) | Southward migration                |
| 168750      | Gulf of Mottama, Myanmar                                      | 17.20°N, 96.84°E                       | 28/4–12/5/2019 (14)  | Northward migration                |
| 168750      | Turukhansky District, Krasnoyarsk Krai, Russia                | 67.91°N, 82.52°E                       | 4/6–26/8/2019 (83)   | Breeding grounds                   |
| 168750      | Lodipur Utrauwa, Uttar Pradesh, India                         | 26.15°N, 81.04°E                       | 31/8–6/9/2019 (6)    | Southward migration                |
| 168750      | Bhitarkanika National Park, Odisha, India                     | 20.67°N, 86.91°E                       | 10/9–2/10/2019 (22)  | Southward migration                |

**Note:** For the criteria of stopover site see methods.

**Supplementary Table S7. Bird ringing recoveries and flag re-sightings of shorebirds from Southeast Asia and Australia possibly taking a westerly migration route or Trans-Himalayan crossing**

| No. | Species            | Flagging & ringing site                              | Date flagged or ringed | Observation or recapture site                   | Date seen     | Source <sup>1</sup> | Method <sup>2</sup> |
|-----|--------------------|------------------------------------------------------|------------------------|-------------------------------------------------|---------------|---------------------|---------------------|
| 1   | Curlew Sandpiper   | Werribee Sewage Farm, Melbourne, Victoria, Australia | Nov 1976               | Point Calimere, India                           | Aug 1980      | 1                   | 1                   |
| 2   | Curlew Sandpiper   | Victoria, Australia                                  |                        | Chilika Lake, India                             | Not available | 1                   | 2                   |
| 3   | Curlew Sandpiper   | Western shore of Alakoul Lake, Kazakhstan            | 19/7/1991              | Kuala Kurau, Perak, Malaysia                    | 6/2/1992      | 2                   | 1                   |
| 4   | Curlew Sandpiper   | Kuala Selangor, Malaysia                             | Jan 1978               | Kazakhstan (76.05E)                             | Aug 1978      | 2, 3                | 1                   |
| 5   | Curlew Sandpiper   | Northwest Australia                                  |                        | Bundala National Park, Sri Lanka                | 20/8/2005     | 6                   | 2                   |
| 6   | Sanderling         | Eighty Mile Beach, Australia                         | 2/3/2013               | Modhava Coast, Mandvi, Gujarat, India           | 21/11/2013    | 1, 4                | 2                   |
| 7   | Terek Sandpiper    | Orange flag, North-west Australia                    |                        | Kan Maw island, Myanmar                         | 25/11/2016    | 5                   | 2                   |
| 8   | Lesser Sand Plover | Sungei Buloh Wetland Reserve, Singapore              |                        | Gulf of Mottama, Myanmar                        | 12/3/2013     | 7                   | 2                   |
| 9   | Lesser Sand Plover | Ko Libong, Thailand                                  | 26/3/2009              | Gulf of Mottama, Myanmar                        | Dec 2011      | 8                   | 1                   |
| 10  | Lesser Sand Plover | Ko Libong, Thailand                                  | 29/3/2009              | Gulf of Mottama, Myanmar                        | 21/5/2013     | 8                   | 1                   |
| 11  | Lesser Sand Plover | Kapar Power Station, Malaysia                        | 8/12/2007              | Gulf of Mottama, Myanmar                        | Not available | 8                   | 1                   |
| 12  | Lesser Sand Plover | Inner Gulf of Thailand                               |                        | Tianquan River, Tianquan County, Sichuan, China | 2/5/2019      | 9                   | 2                   |
| 13  | Asian Dowitcher    | Alabana Island of Chilika Lake, India                | Mar 2016               | Samut Sakhon, Thailand                          | 15/8/2018     | 8                   | 2                   |

**Notes:**

All dates are indicated by day/month/year.

<sup>1</sup>Source: 1- Balachandran, S., Katti, T. & Manakadan, R. *Indian Bird Migration Atlas*. (Bombay Natural History Society & Oxford University Press, New Delhi, 2018); 2- Yatim, S.H. Short Notes on Band Recovery of Waders in 1991/1992. *Journal of Wildlife and Parks* 11, 58 – 59 (1991); 3- Wells, D. R. *The Birds of Thai-Malay Peninsula*, Volume 1: Non Passerines. (Academic Press, 1999); 4- Tiwari, J.K. An Australian Ringed Bird seen in Kutch, India. *Tattler* 31, 19 (2013); 5- Zöckler, C., Moses, S. & Lwin, S.T. The importance of the Myeik mangroves and mudflats, Tanintharyi, Myanmar for migratory waders and other waterbirds. *Wader Study* 126, 129-141 (2019); 6- Bellio, M. & Kaluthota, C. Australian Curlew Sandpiper on passage through Sri Lanka, *Wader Study Group Bull.* 110, 66 (2006); 7- Hiroshi Tomida pers. comm; 8 - Bung Boraphet Wildlife Research Station, Department of National Parks, Wildlife and Plant Conservation, Thailand; 9 – Pinjia Jue pers. comm.

<sup>2</sup>Method: 1- Ringing recovery; 2- Colour flag observation.



**Supplementary Table S8. Summary of Common Redshanks and Whimbrels equipped with geolocators and PTT satellite transmitters in Singapore, 2015–2019.**

|                                                                                                          | Geolocator tagging of Common Redshanks at Sungei Buloh Wetland Reserve (2015-2016) | Satellite tagging of Common Redshanks at Sungei Buloh Wetland Reserve (2018-2019) | Satellite tagging of Whimbrels at Sungei Buloh Wetland Reserve (2018-2019) | Satellite tagging of Whimbrels at Chek Jawa, Pulau Ubin (2018-2019) |
|----------------------------------------------------------------------------------------------------------|------------------------------------------------------------------------------------|-----------------------------------------------------------------------------------|----------------------------------------------------------------------------|---------------------------------------------------------------------|
| No. of birds tagged                                                                                      | 99                                                                                 | 4                                                                                 | 5                                                                          | 6                                                                   |
| No. of tags retrieved                                                                                    | 10                                                                                 | n/a                                                                               | n/a                                                                        | n/a                                                                 |
| No. of birds with no data /remained at non-breeding ground without migration data collected <sup>1</sup> | 1                                                                                  | 1                                                                                 | 0                                                                          | 3                                                                   |
| No. of first year/ sub-adult birds carrying out partial migration (did not migrate to breeding grounds)  | 1                                                                                  | 0                                                                                 | 2                                                                          | 1                                                                   |
| No. of adult birds with full or partial migration data available                                         | 8 <sup>2</sup>                                                                     | 3 <sup>2</sup>                                                                    | 3                                                                          | 2 <sup>2</sup>                                                      |

**Notes:**

n/a = not applicable

1 – Data from one geolocator was not able to be retrieved. One Redshank and two Whimbrels lost signals before migration and one sub-adult Whimbrel did not migrate.

2 – Three geolocator tagged Redshanks, one satellite tagged Redshank and one satellite tagged whimbrel did not record a full migration cycle.

**Supplementary Figure S1. Individual migration routes of Common Redshanks based on light-level geolocation in 2015 and 2016 and satellite trackers in 2018 and 2019.** One individual was tracked both by geolocator (P359) in 2015 and satellite tracker (36139) in 2018. Map Source: ETOPO1 1 Arc-Minute Global Relief Model dataset provided by NOAA <https://www.ngdc.noaa.gov/mgg/global/global.html>. Species distribution map provided by BirdLife International.

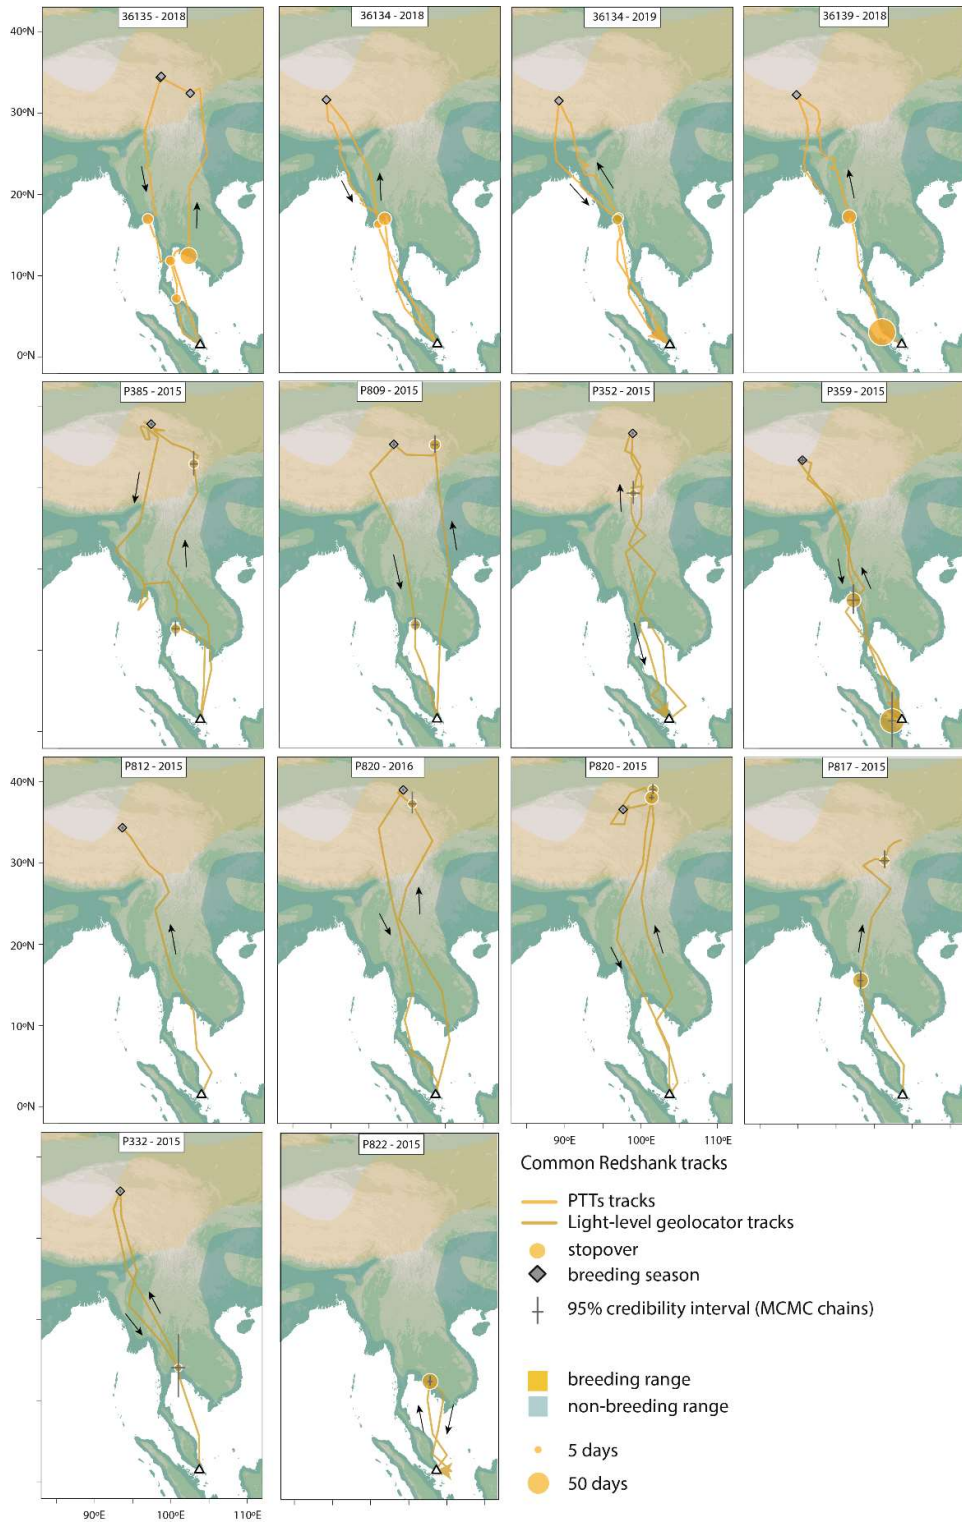

**Supplementary Figure S2. Individual migration routes of Whimbrels based on satellite trackers in 2018 and 2019.** Map Source: ETOPO1 1 Arc-Minute Global Relief Model dataset provided by NOAA <https://www.ngdc.noaa.gov/mgg/global/global.html>. Species distribution map provided by BirdLife International.

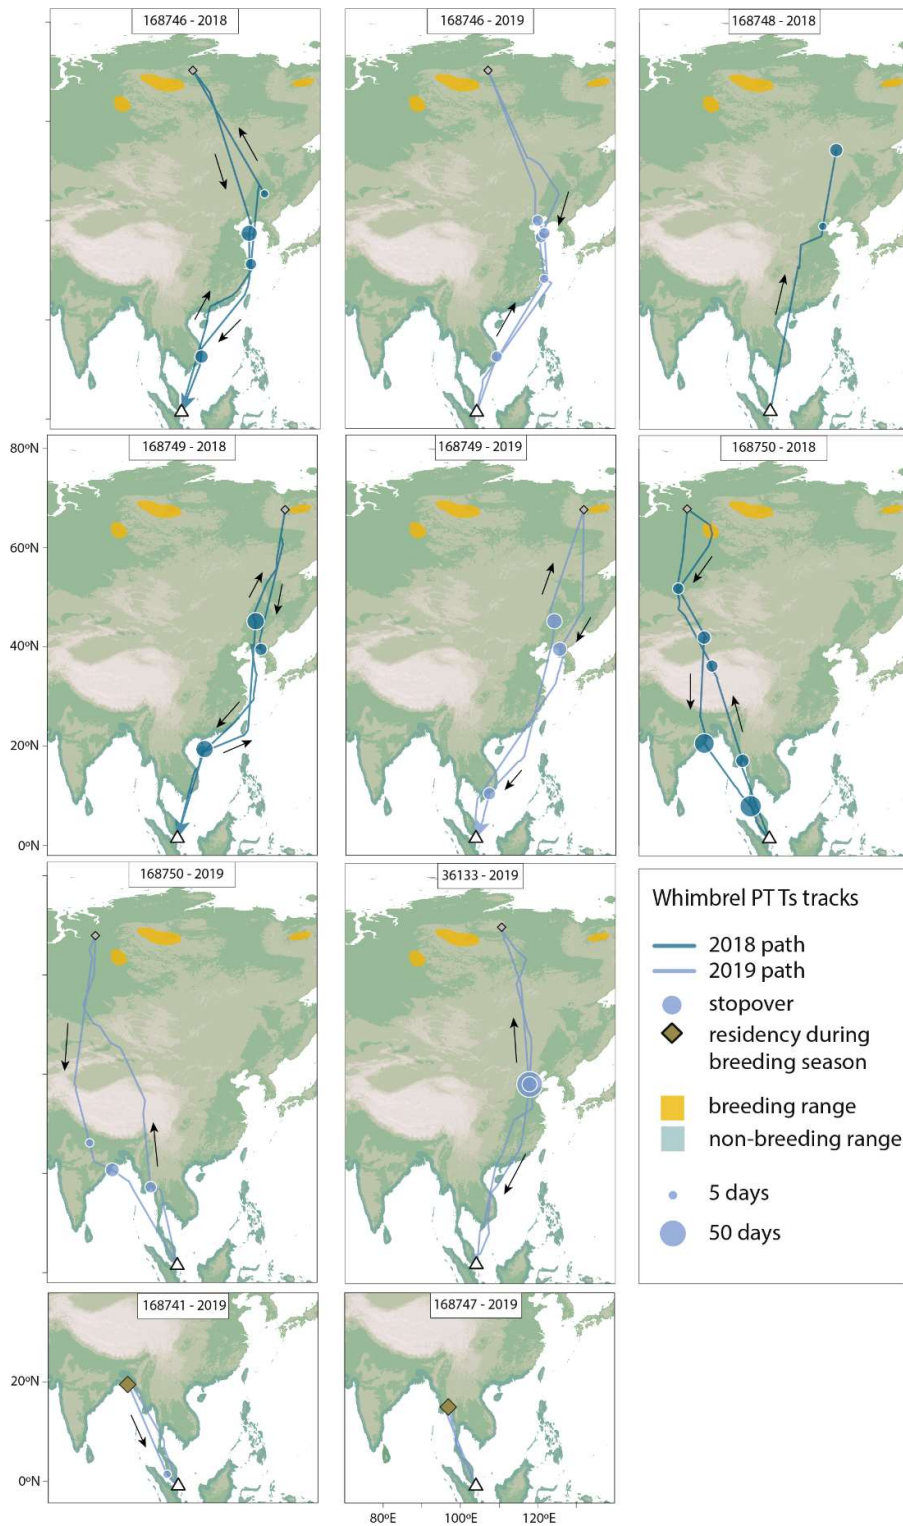

**Supplementary Figure S3. Overall ground speeds recorded for Common Redshanks and Whimbrels by satellite tracking (PTT).**

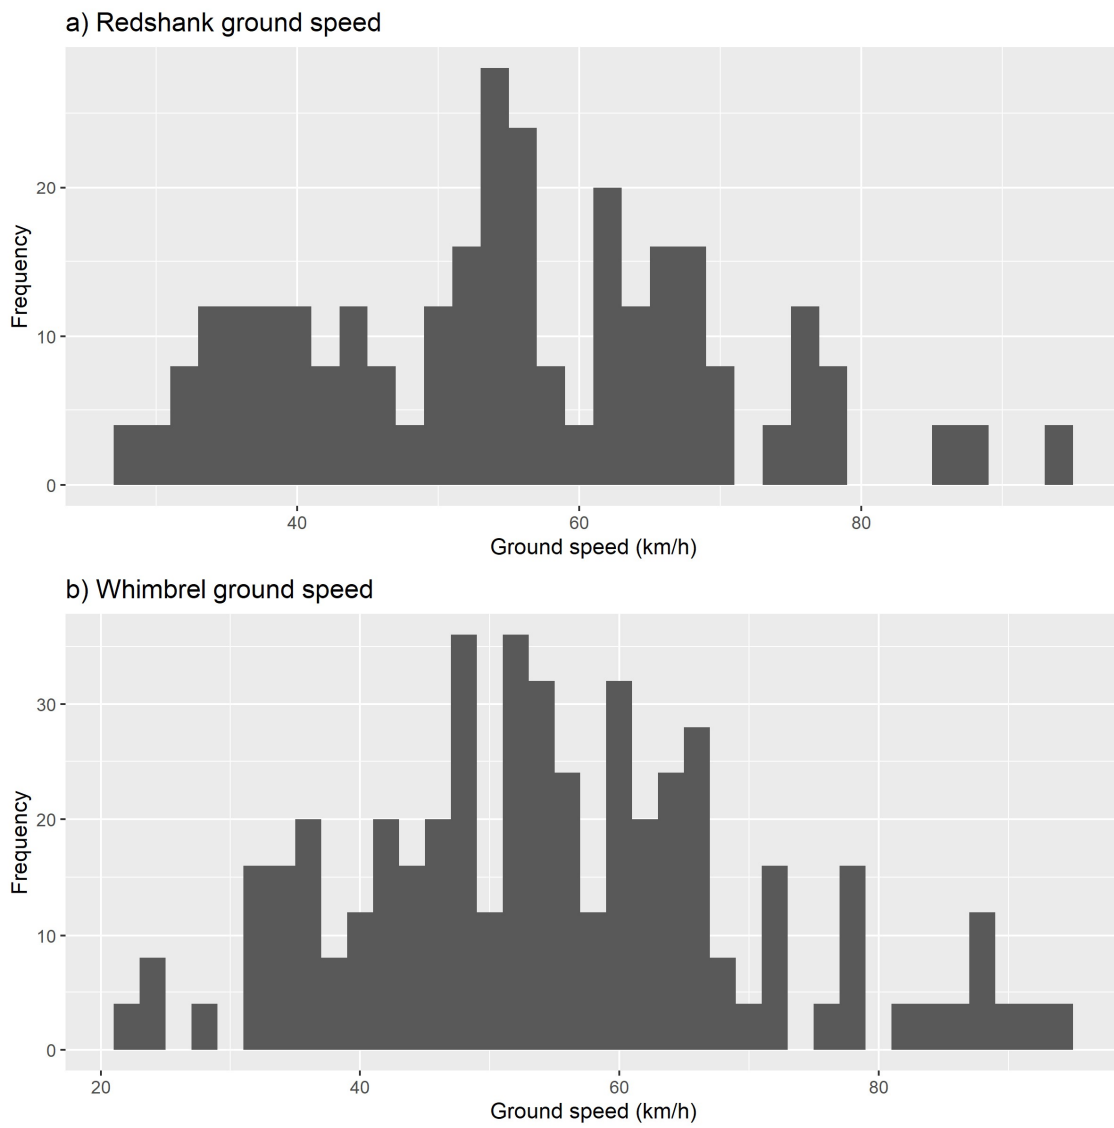

Supplement: 41598_2020_77897_MOESM1_ESM.pdf [file 41598_2020_77897_MOESM1_ESM.pdf]
